# Supplementary material for: Immunomodulatory Factors in Primary Endometrial Cell Cultures Isolated from Cancer and Noncancerous Human Tissue–Focus on RAGE and IDO1
Source: MDPI journal article supplement (doi:10.3390/cells10051013), 2021-04-25
Supplement: s1 [file s1]

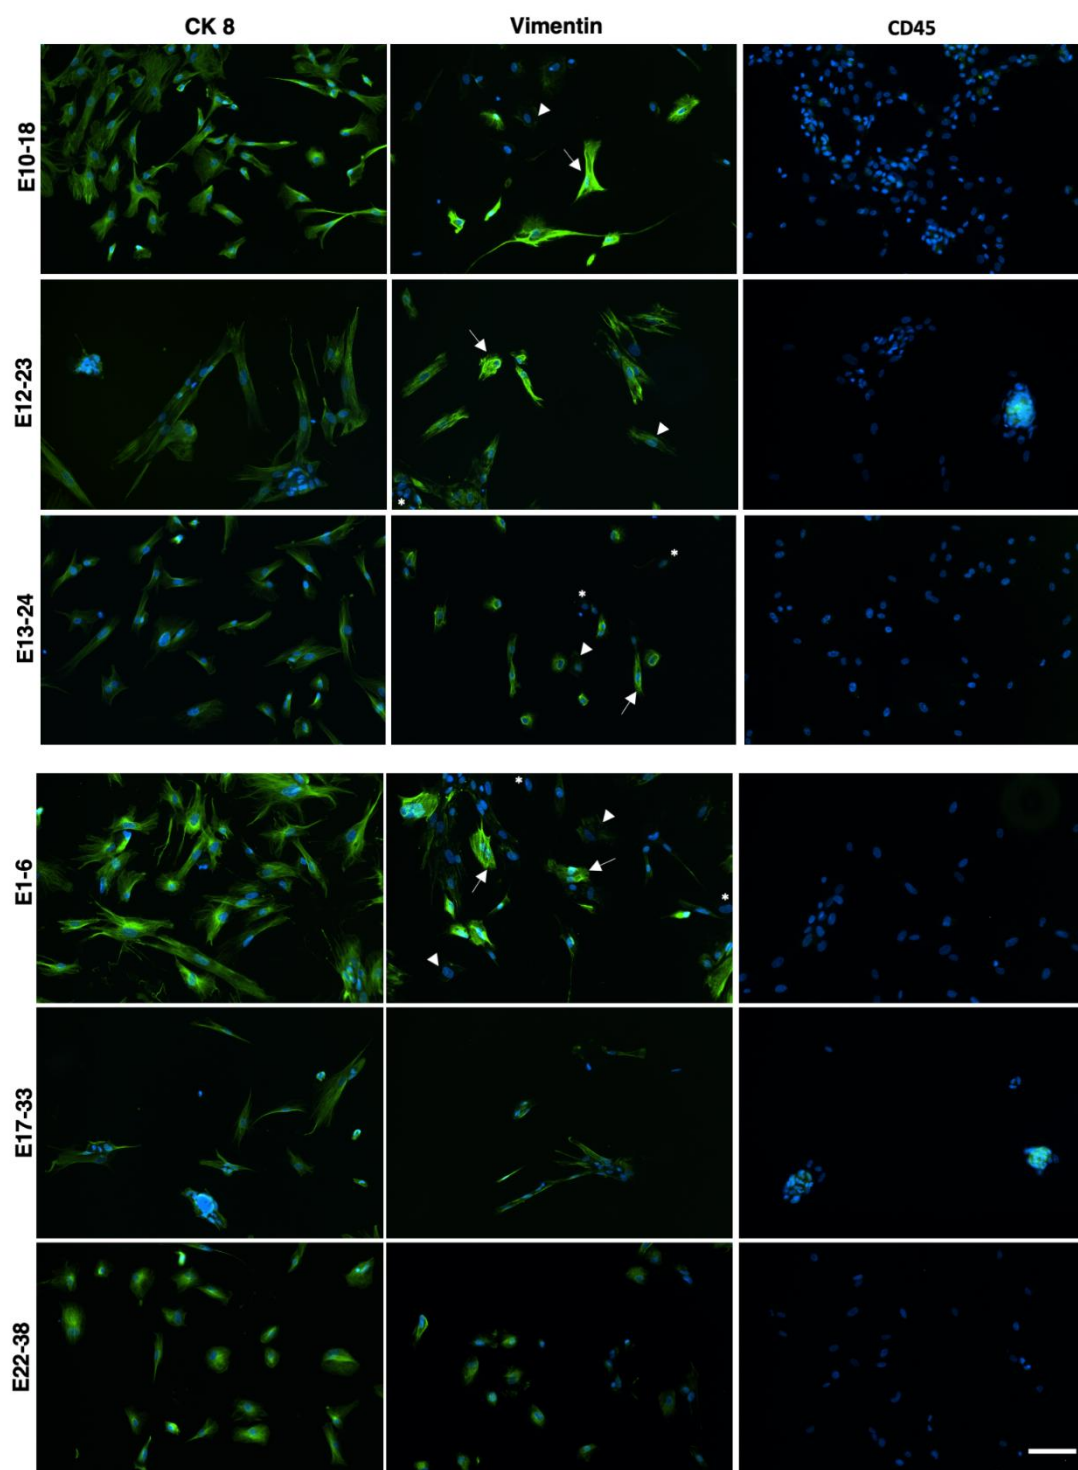

**Figure S1.** Expression of CK8, vimentin, and CD45 on endometrial cells cultured in vitro. Cells isolated from cancer (E10-18, E12-23, E13-24) and noncancerous (E1-6, E17-33, E22-38) endometrium were stained for CK8, vimentin and CD45 (green) and co-stained with DAPI (blue). Scale bar 100  $\mu$ m; Arrow —intense positive, arrowhead —weak positive; star —negative staining for vimentin.
